# Supplementary material
Source: Research Square preprint supplement (doi:10.21203/rs.3.rs-9187250/v1)
Supplement: Supplementary file 1 [file f1a186c399bca00becbba9d9.docx]

**Supplementary material to:**

**A source-pathway-receptor framework for quantifying ecological risk to shallow- and deep-rooted vegetation under heavy metal contamination**

Prabhat Dwivedi a, Brijesh Kumar Yadav b*

a,b Department of Hydrology, Indian Institute of Technology, Roorkee, 247667, India

*Corresponding author E-mail: [brijesh.yadav@hy.iitr.ac.in](mailto:brijesh.yadav@hy.iitr.ac.in)

**Introduction**

The Supplementary Material (SM1–SM4) provides additional methodological details and extended analytical results that support and complement the main findings of this study. Supplementary Figures (S1–S6) and Tables (S1–S2) provide further details of the analyzed results from the study.

**Supplementary Material 1**

## Sampling and measurement of heavy metals in surface water and soil

This section provides the details of primary data acquisition process, including surface water and soil sampling, and laboratory measurement of heavy metal concentration used in section 2.

Prior to the field investigation, we identified strategic locations through a virtual survey using Google Earth Pro. Across the Hindon River Basin (HRB), 35 sampling locations covering all delineated sub-basins were selected for site survey. A field visit was conducted during the pre- and post-monsoon season in 2023 for visual observation, stakeholder interaction, and the collection of soil and surface water samples. Surface water samples were collected from the main Hindon River, tributaries (Kali and Krishni), wastewater drains, and minor irrigation canals in accordance with the APHA (1998) guidelines. We collected 500 ml of water from midstream in sterile low-density polyethylene (LDPE) bottles pre-washed with 10% HNO3 and deionized water. A water sampler tied to a rope was used to avoid surface disturbance during sampling. Soil samples were collected using a hand-operated soil auger up to a depth of 100 cm. We collected 1000 g of soil from 30, 60, and 90 cm depth and stored it in LDPE zip-lock bags. All samples were preserved at 4°C in an airtight, insulated container with ice packs. Each sampling location was georeferenced using a Garmin Global Positioning System (GPS), and nearby land use activities and hydrological conditions were recorded before transporting the samples to the Groundwater Laboratory at IIT Roorkee for chemical analysis.

In the laboratory, samples stored at 4°C were brought to room temperature prior to analysis. Acid digestion was performed using the Anton Paar Multiwave Go microwave digestion system. For surface water samples, 10 ml of water was mixed with 2±0.1 ml of HNO3 and 3±0.1 ml of HCl, and digested at 180°C. For soil samples, 0.25 g of air-dried soil sieved through a 150 µm mesh was mixed with 2.5 ml HNO3 and 0.5 ml H2O2. Following digestion, the samples were filtered using Whatman No. 42 filter paper, diluted with deionized water, and acidified with Merck Suprapur nitric acid (pH ≤2) to stabilize the metal ions. Heavy metal concentrations were quantified using Inductively Coupled Plasma-Mass Spectrometry (ICP-MS; Agilent Technologies) with a detection limit of 0.001 mg/l. A calibration curve was prepared using a multi-point standard solution from Merck India. All samples were tested within 72 hours, keeping quality checked after every eight samples with a blank and a known standard solution. Soil heavy metal concentrations measured at different depths were averaged to represent root-zone contamination and subsequently used in the vegetation-based ecological risk assessment.

**Supplementary Material 2**

# Environmental parameters grouping using multivariate analysis

This section describes the grouping of environmental parameters into the SCI, EPI, and VRV components as defined in Section 2.2.

To objectively group environmental parameters into the SCI, EPI, and VRV components, principal component analysis (PCA) was applied to the normalized datasets. Parameter grouping was performed based on dominant component loading and ecological relevance within the source-pathway-receptor framework. The extracted component scores were subsequently weighted using the entropy weighting method to quantify the relative contribution of each indicator. Spatial clustering of CSI, EPI, and VRV was further examined using Moran’s I spatial autocorrelation analysis. Fig. S1 (a) presents the PCA result, where the first two components explain 25.38% and 17.49% of the total variance. This level of explained variance is considered acceptable for high-dimensional environmental datasets (Jin et al., 2019). Parameters representing surface contamination (Cr, Ni, As, Cd, Hg, Pb, BU, WL, WB, IndDen, and DistIndus) showed strong positive loadings on PC1 (Fig. S1b). These variables collectively represent contamination derived from anthropogenic activities and were therefore classified as Surface Hazard (SH). Heavy metals in soil exhibited moderate contributions to both PC1 and PC2, whereas soil texture variables displayed the strongest absolute loadings on PC2. This pattern delineates the Subsurface Hazard (SSH) indicator. Flow-related parameters, including terrain slope, ET, SURQ, and irrigation intensity, were predominantly aligned with PC2, supporting their classification as Surface Hydrological Forcing (SHF). Similarly, subsurface hydrological variables such as ET, PERC, and WYLD loaded mainly on PC2 and were assigned to Subsurface Hydrological Forcing (SSHF). Vegetation variables (Fig. S1c) were distributed according to seasonal and root-specific characteristics. Seasonal vegetation indicators (Kharif, Rabi, Zaid, and double/triple cropping) exhibited loadings ranging from −0.069 to 0.242 on PC1 and 0.029 to 0.234 on PC2. In contrast, perennial vegetation types (forest, grassland, and plantation) showed loadings between 0.0497-0.2343 on PC1 and 0.1485-0.1723 on PC2. These loading patterns supported the classification of vegetation into seasonal and root-specific vegetation groups.

The groped parameters obtained from PC1 and PC2 were subsequently evaluated using Global Moran’s I to assess spatial clustering across the 35 sub-basins of the HRB. Figs. S2(a,b) illustrates the spatial autocorrelation patterns for surface hazard (SH) and subsurface hazard (SSH). High positive spatial autocorrelation was observed during both seasons (pre-monsoon: I = 0.245, z = 3.30, p < 0.001; post-monsoon: I = 0.181, z = 2.86, p = 0.004). This indicates geographically contiguous sub-basins with elevated contamination levels. Among all indicators, SSH exhibited the strongest clustering among all indicators (pre-monsoon: I = 0.525, z = 5.37, p < 0.001; post-monsoon: I = 0.494, z = 5.07, p < 0.001), consistent with soil-bound metal accumulation patterns identified in PCA. Hydrological forcing indicators (Figs. S2c,d) also demonstrated strong spatial clustering for both surface (pre-monsoon: I = 0.420, z = 4.44; post-monsoon: I = 0.403, z = 4.30; p < 0.001) and subsurface components (pre-monsoon: I = 0.362, z = 3.73, p < 0.001; post-monsoon: I = 0.231, z = 2.56, p = 0.010). These results reflect the spatial persistence of hydrological gradients influencing contaminant transport and mobilization. Vegetation sensitivity exhibited significant but comparatively weaker clustering in seasonal composites (pre-monsoon: I = 0.235, z = 2.77, p = 0.0057; post-monsoon: I = 0.090, z = 3.23, p = 0.0012). In contrast, individual vegetation groups (seasonal, shallow-root, and deep-root) showed weak or non-significant spatial autocorrelation (p > 0.09), indicating greater spatial heterogeneity in vegetation distribution.

**Supplementary Material 3**

**Entropy weighting method**

This section provides the details of the entropy weighting method (EWM) used in section 2.3. The EWM was applied to objectively quantify the relative contribution of environmental parameters to the overall contamination pressure across the basin (Chen et al., 2023). This method minimizes subjectivity by assigning weights based on the intrinsic variability and information content of each parameter. First, all selected measured values of parameters in the sub-basin were normalized ​ to a nondimensional scale (0-1) to eliminate the effect of differing units and magnitudes (Eq. 1). The normalized values were converted to proportional values (Eq. 1), which form the basis for calculating the entropy value for each parameter (Eq. 2). The entropy measures the degree of spatial dispersion of a parameter across all sub-basins. Parameters with higher variability (lower entropy) contribute more information to the system and therefore receive higher weights. The degree of diversification from Eq. (3) represents the information utility of each parameter, and the corresponding entropy weight is derived using Eq. (4). These weights were then aggregated with the normalized parameter values to compute a composite score for each sub-basin (Eq. 4). This represent the weighted contamination pressure contributed by surface hazard, subsurface hazard, hydrological forcing, and vegetation vulnerability score. Parameters yielding higher deviations were identified as dominant contributors to contamination dynamics.

|  |  | (1) |
| --- | --- | --- |
|  |  | (2) |
|  | | (3) |
|  |  | (4) |

Lower entropy values indicate parameters with higher spatial variability and stronger discriminatory power, and thus greater influence on the composite score. The final weighted parameter sets were used to compute all subsequent hazard, forcing, and receptor vulnerability scores in the ecological vegetation risk framework.

**Supplementary Material 4**

## Statistical characterization of environmental parameters

This section presents an extended analysis of the results in section 4.1, providing additional details on the spatial heterogeneity of heavy metals in surface water and soil. It also describes the distribution of environmental parameters that contribute to this spatial variability in heavy metal concentrations.

Fig. S3 (a) reveals pronounced spatial contrasts of heavy metal variability in surface water across different regions of HRB. In the UHB, pre-monsoon concentrations of Cr, Ni, Cd, and Pb affected 50% of sub-basins, whereas Hg and As impacted 33.33% and 8.33%, respectively. Conversely, post-monsoon concentrations of Ni, Cd, and Hg exhibited residual impacts in 25% of sub-basins. In the MHB, pre-monsoon concentrations of Cr and Hg affected 69.23% and 61.54% of sub-basins, respectively, while persistent Cd contamination was observed in 23.08% of sub-basins. The LHB exhibited the highest pre-monsoon contamination intensity, with 100% of sub-basins classified as unsafe for Cr, Cd, and Pb, and 90% affected by Hg. Despite notable post-monsoon improvements, Cd contamination remained relatively high, affecting 60% of sub-basins, while Hg and Ni impacted 20% and 10%, respectively. In soil, the regional assessment shown in Fig. S3 (b) revealed uniform pre-monsoon contamination of Cr, Ni, Cd, and Pb across UHB, MHB, and LHB, with 100% of sub-basins affected. This spatial uniformity persisted during the post-monsoon season as a result of limited seasonal variability. Among the regions, the MHB exhibited the largest contaminated area across most metals, followed by the LHB and UHB, where comparatively lower spatial coverage was observed for As and Hg.

To assess the contribution of environmental parameters in the spatial heterogeneity of heavy metal concentrations in surface water and soil, environmental parameters representing landscape and terrain characteristics, hydrological variables, and anthropogenic pressure indicators were analyzed. During the analysis of land-use patterns across the HRB, we observed dominant agricultural practices involving seasonally changing vegetation. Double and triple cropping practices covered 48.30% (2810.22 km²) of the basin, followed by Kharif crops (26.32%; 1531.22 km²), Rabi crops (1.46%; 85.16 km²), and Zaid crops (~0.3 km²). The prevalence of seasonal vegetation, particularly within the UHB and MHB, is associated with enhanced irrigation demand. Consistent with this pattern, irrigation intensity increased substantially during the post-monsoon season (IrriInt = 0.66) compared to the pre-monsoon period (IrriInt = 0.19). In contrast to agricultural vegetation, naturally occurring vegetation such as plantations and forest cover occupied a relatively limited area of 369.05 km² and 40.14 km², while grassland and wasteland together constituted only a minor proportion of the basin area. In parallel with agricultural practices, built-up land accounted for 14.45% (840.96 km²) of the HRB, with a major portion lying within the LHB. These built-up areas support urban and industrial activities, with industrial density notably higher in the MHB (IndDen = 0.03) and LHB (IndDen = 0.08) compared to the UHB (Table S1). Terrain characteristics further contribute to the observed spatial variability in contamination. Slope analysis indicates that 40.20% of the HRB, primarily distributed across the UHB and MHB, falls within the 2-4% slope category, followed by 29.83% under 0-2% slopes. Steeper slopes (>4%) accounted 29.47% of the basin area and are predominantly concentrated in the LHB. Soil texture analysis across HRB reveals the dominance of sandy soils (41.60%), followed by silt (37.86%) and clay (20.53%) fractions. While the UHB exhibits a relatively balanced soil texture composition, both the MHB and LHB are characterized by higher sand content, covering 42.66% and 43% of their respective areas. The seasonal dynamics of heavy metal contamination are further influenced by hydrological variables, including evapotranspiration (ET), percolation (PERC), surface runoff (SURQ), and water yield (WYLD) across the HRB (Dwivedi and Yadav, 2025). Comparative analysis between pre- and post-monsoon periods indicates a decline in ET (from 25.17 to 21.59) and PERC (from 5.12 to 0.32). Conversely, the enhanced contribution of surface runoff following monsoonal rain increased water yield from 4.80 to 7.91.

**Supplementary Figures**

**
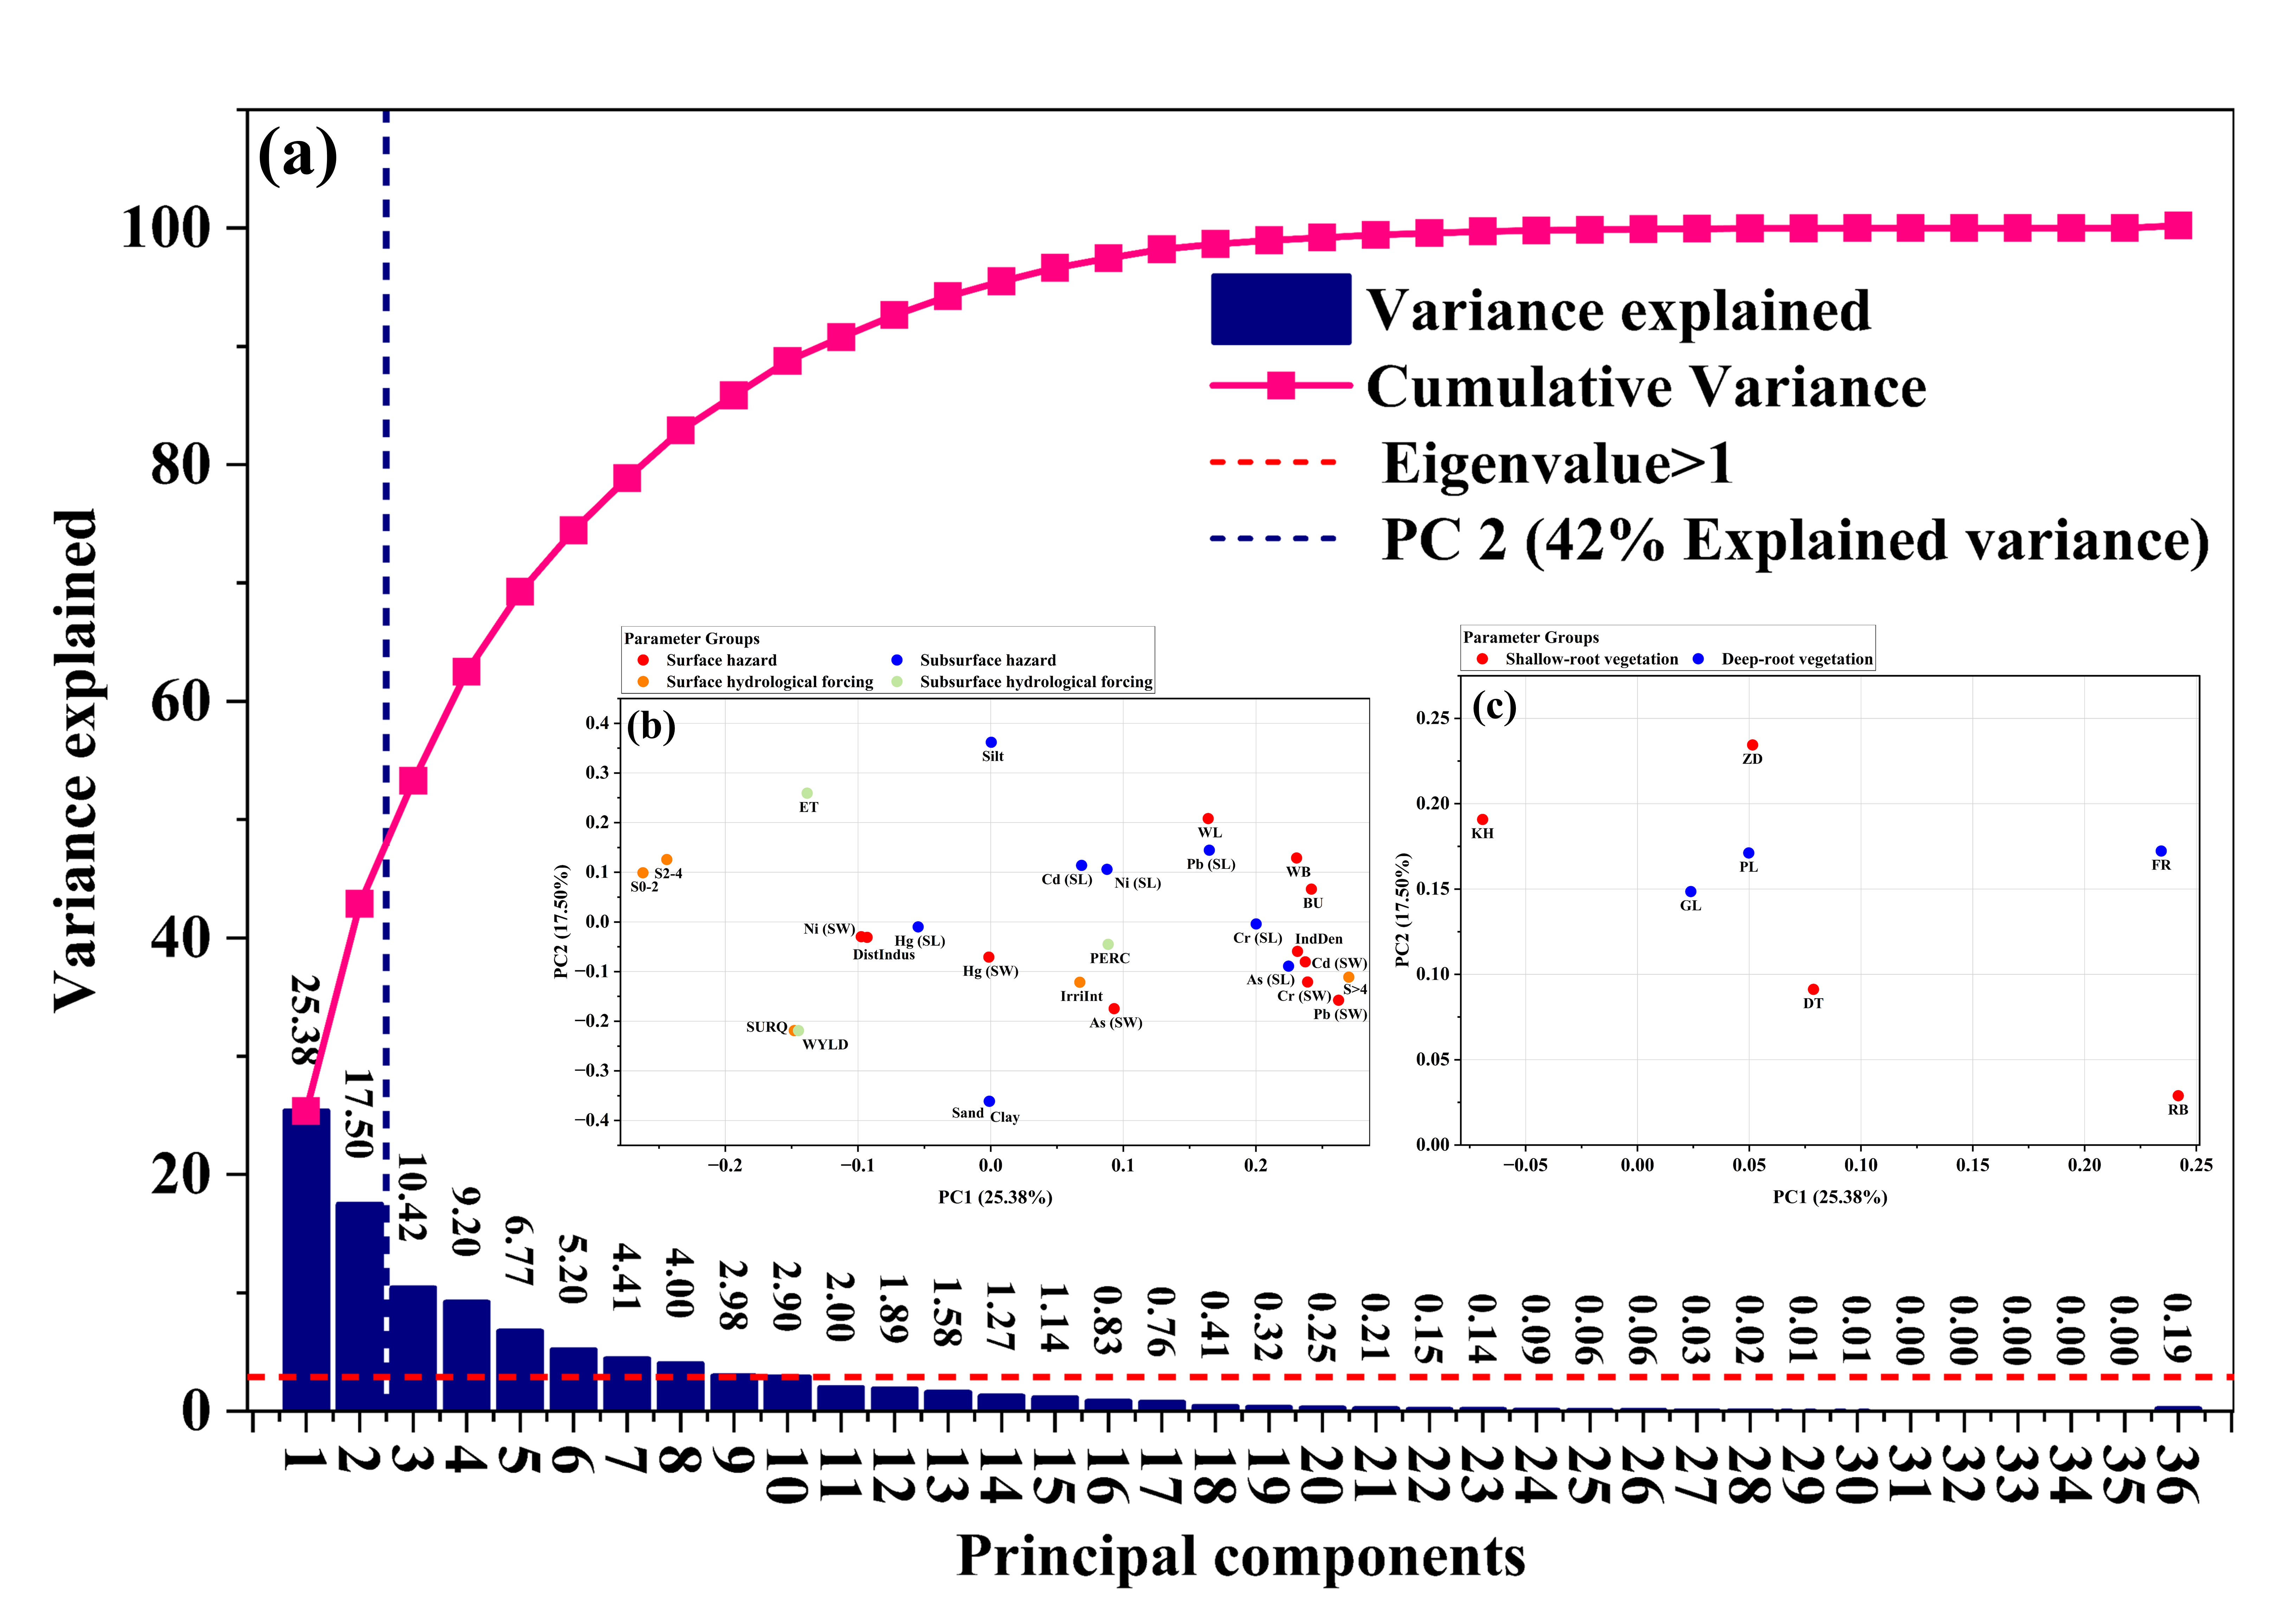
**

**Fig. S1.**PCA results showing (a) scree plot with eigenvalues and cumulative variance, (b) variable loadings of hazard and hydrological forcing parameters on PC1 and PC2, and (c) score distribution of shallow- and deep-root vegetation types on PC1 and PC2*.*

**

**

**Fig. S2.** Spatial autocorrelation maps of (a) surface and (b) subsurface hazard and (c) surface (d) subsurface hydrological forcing indicators during the pre- and post-monsoon season in 2023.

**

**

**Fig. S3.** Spatial and seasonal distribution of heavy metal concentration in (a) surface water and (b) soil during the pre- and post-monsoon seasons.

**

**

**Fig. S4.** Spatial and seasonal distribution of CSI across (a) sub-regions, and (b) MFOZs of the HRB.

**

**

**Fig. S5.** Spatial and seasonal distribution of EPI across (a) sub-regions, and (b) MFOZs of the HRB.

**

**

**Fig. S6.** Spatial and seasonal distribution of CSI across (a) sub-regions, and (b) MFOZs of the HRB.

**Supplementary Tables**

**Table S1** Statistical summary of environmental parameters across the measurement period.

| **Parameters**  **(Units)** | **Measurement period** | **Mean ± SD** | **Min-Max** | **CV** |
| --- | --- | --- | --- | --- |
| Cr (SW) (mg/l) | Pre-monsoon | 0.1275±0.1148 | 0.0096-0.5383 | 0.9001 |
|  | Post-monsoon | 0.0339±0.0087 | 0.0116-0.0501 | 0.2554 |
| Ni (SW) (mg/l) | Pre-monsoon | 0.0368±0.0425 | 0.0084-0.1873 | 1.154 |
|  | Post-monsoon | 0.0152±0.005 | 0.0012-0.0315 | 0.3292 |
| As (SW) (mg/l) | Pre-monsoon | 0.0064±0.0044 | 0.0003-0.0172 | 0.6864 |
|  | Post-monsoon | 0.0036±0.0015 | 0.0009-0.0072 | 0.4252 |
| Cd (SW) (mg/l) | Pre-monsoon | 0.0358±0.0549 | 0.0008-0.2698 | 1.5352 |
|  | Post-monsoon | 0.0031±0.0017 | 0.0005-0.0084 | 0.5357 |
| Hg (SW) (mg/l) | Pre-monsoon | 0.0186±0.0735 | 0.0001-0.3706 | 3.964 |
|  | Post-monsoon | 0.0004±0.0007 | 0.0001-0.0026 | 1.5625 |
| Pb (SW) (mg/l) | Pre-monsoon | 0.0404±0.0372 | 0.0034-0.1304 | 0.9206 |
|  | Post-monsoon | 0.0044±0.0028 | 0.0005-0.0098 | 0.6239 |
| Cr (SL) (mg/l) | Pre-monsoon | 34.1037±9.7856 | 21.1162-62.2407 | 0.2869 |
|  | Post-monsoon | 31.1665±10.1662 | 18.8368-59.9613 | 0.3262 |
| Ni (SL) (mg/l) | Pre-monsoon | 19.7807±4.8561 | 11.015-30.108 | 0.2455 |
|  | Post-monsoon | 17.5485±5.15 | 9.3288-28.4219 | 0.2935 |
| As (SL) (mg/l) | Pre-monsoon | 6.2768±1.9753 | 4.363-10.4448 | 0.3147 |
|  | Post-monsoon | 3.43±1.9647 | 1.5097-7.5915 | 0.5728 |
| Cd (SL) (mg/l) | Pre-monsoon | 1.9649±1.1987 | 0.4565-5.8794 | 0.61 |
|  | Post-monsoon | 0.6036±0.8753 | 0.0001-4.1788 | 1.4503 |
| Hg (SL) (mg/l) | Pre-monsoon | 0.7139±2.9055 | 0.0001-17.4 | 4.0701 |
|  | Post-monsoon | 0.5623±2.9173 | 0.0001-17.3223 | 5.1879 |
| Pb (SL) (mg/l) | Pre-monsoon | 18.4746±9.0164 | 9.6363-50.6991 | 0.488 |
|  | Post-monsoon | 12.8576±9.0867 | 2.9776-45.0749 | 0.7067 |
| BU (Km2) | Annual | 24.0273±52.005 | 0.7063-316.5887 | 2.1644 |
| KH (Km2) | Annual | 43.7491±30.977 | 1.605-120.4282 | 0.7081 |
| RB (Km2) | Annual | 2.4332±9.0881 | 0.0126-53.5468 | 3.735 |
| ZD (Km2) | Annual | 0.0081±0.0162 | 0.0000-0.0631 | 1.9925 |
| DT (Km2) | Annual | 80.292±54.4089 | 4.0455-187.9308 | 0.6776 |
| CF (Km2) | Annual | 2.3001±6.2471 | 0.0252-37.472 | 2.716 |
| PL (Km2) | Annual | 10.5444±13.9817 | 0.0000.1766-59.44 | 1.326 |
| FR (Km2) | Annual | 1.1468±2.0236 | 0.0000-10.6513 | 1.7645 |
| GL (Km2) | Annual | 0.1032±0.3049 | 0.0000-1.6239 | 2.9557 |
| WL (Km2) | Annual | 1.807±3.7938 | 0.0000-16.6675 | 2.0995 |
| WB (Km2) | Annual | 1.2984±1.9629 | 0.0000-8.9707 | 1.5118 |
| S0-2 (%) | Annual | 29.8284±7.4182 | 9.9031-40.3409 | 0.2487 |
| S2-4 (%) | Annual | 40.2037±5.5411 | 13.032-43.4669 | 0.1378 |
| S>4 (%) | Annual | 29.4665±11.0632 | 16.9647-65.4343 | 0.3754 |
| Clay (%) | Annual | 20.5324±0.7903 | 19.0000-21.0000 | 0.0385 |
| Silt (%) | Annual | 37.86±3.1539 | 36.0000-44.0000 | 0.0833 |
| Sand (%) | Annual | 41.5994±2.3688 | 37.0000-43.0000 | 0.0569 |
| ET (%) | Pre-monsoon | 25.1731±6.2048 | 15.0853-36.7927 | 0.2465 |
|  | Post-monsoon | 21.59±3.8373 | 15.021-33.2112 | 0.1777 |
| WYLD (mm) | Pre-monsoon | 5.1209±1.8176 | 1.9799-9.7514 | 0.3549 |
|  | Post-monsoon | 0.3167±0.1472 | 0.1246-0.7746 | 0.4648 |
| SURQ (mm) | Pre-monsoon | 0.0005±0.0001 | 0.0003-0.0007 | 0.2973 |
|  | Post-monsoon | 0.0464±0.1114 | 0.0007-0.4393 | 2.4039 |
| PERC (mm) | Pre-monsoon | 4.7979±1.3892 | 2.7142-7.5714 | 0.2895 |
|  | Post-monsoon | 7.9138±2.3684 | 2.6607-13.8697 | 0.2993 |
| IndDen (1/Km2) | Annual | 0.0417±0.0761 | 0.0009-0.3624 | 1.8245 |
| DistIndus (Km) | Annual | 7.9706±4.6256 | 0.4700-16.8100 | 0.5803 |
| IrriInt (Km2/Km2) | Pre-monsoon | 0.1896±0.0387 | 0.1282-0.2737 | 0.2039 |
|  | Post-monsoon | 0.6575±0.1383 | 0.4272-0.9161 | 0.2103 |

****SD- Standard Deviation, CV-Coefficient of Variance***

**Table S1** Distribution of shallow-root vegetation-based ecological risk (S-VER) and deep-root vegetation-based ecological risk (D-VER) across the MFOZs.

| Ecological risk | Region | Classification | EDZ | | | | APZ | | | | EFZ | | | |
| --- | --- | --- | --- | --- | --- | --- | --- | --- | --- | --- | --- | --- | --- | --- |
| Percentage of Sub-basin (Pre-monsoon) | Percentage of Sub-basin (Post-monsoon) | Area in Km2 (Pre-monsoon) | Area in Km2 (Post-monsoon) | Percentage of Sub-basin (Pre-monsoon) | Percentage of Sub-basin (Post-monsoon) | Area in Km2 (Pre-monsoon) | Area in Km2 (Post-monsoon) | Percentage of Sub-basin (Pre-monsoon) | Percentage of Sub-basin (Post-monsoon) | Area in Km2 (Pre-monsoon) | Area in Km2 (Post-monsoon) |
| Shallow root vegetation (S-VER) | HRB | Low | 12.50 | 12.50 | 224.27 | 301.97 | 45.00 | 60.00 | 1080.41 | 1440.36 | 50.00 | 50.00 | 751.52 | 599.15 |
| Moderate | 37.50 | 50.00 | 639.81 | 1021.01 | 55.00 | 35.00 | 1298.22 | 785.86 | 50.00 | 50.00 | 499.07 | 651.44 |
| High | 50.00 | 37.50 | 1021.01 | 562.11 | 0.00 | 5.00 | 0.00 | 152.42 | 0.00 | 0.00 | 0.00 | 0.00 |
| UHB | Low | 0.00 | 0.00 | 0.00 | 0.00 | 60.00 | 20.00 | 344.74 | 230.74 | 50.00 | 50.00 | 543.53 | 543.53 |
| Moderate | 0.00 | 12.50 | 0.00 | 80.86 | 40.00 | 60.00 | 365.08 | 326.66 | 50.00 | 50.00 | 443.45 | 443.45 |
| High | 12.50 | 0.00 | 80.86 | 0.00 | 0.00 | 20.00 | 0.00 | 152.42 | 0.00 | 0.00 | 0.00 | 0.00 |
| MHB | Low | 20.00 | 20.00 | 224.27 | 301.97 | 62.50 | 75.00 | 721.63 | 665.32 | 100.00 | 0.00 | 207.99 | 0.00 |
| Moderate | 60.00 | 20.00 | 639.81 | 211.24 | 37.50 | 25.00 | 259.00 | 315.31 | 0.00 | 100.00 | 0.00 | 207.99 |
| High | 20.00 | 60.00 | 211.24 | 562.11 | 0.00 | 0.00 | 0.00 | 0.00 | 0.00 | 0.00 | 0.00 | 0.00 |
| LHB | Low | 0.00 | 0.00 | 0.00 | 0.00 | 14.29 | 71.43 | 14.05 | 544.31 | 0.00 | 100.00 | 0.00 | 55.62 |
| Moderate | 0.00 | 100.00 | 0.00 | 728.90 | 85.71 | 28.57 | 674.13 | 143.88 | 100.00 | 0.00 | 55.62 | 0.00 |
| High | 100.00 | 0.00 | 728.90 | 0.00 | 0.00 | 0.00 | 0.00 | 0.00 | 0.00 | 0.00 | 0.00 | 0.00 |
| Deep root vegetation (D-VER) | HRB | Low | 62.50 | 62.50 | 1075.33 | 1075.33 | 60.00 | 50.00 | 1406.33 | 1149.09 | 16.67 | 16.67 | 207.99 | 207.99 |
| Moderate | 37.50 | 37.50 | 809.76 | 809.76 | 35.00 | 45.00 | 918.88 | 1176.12 | 83.33 | 83.33 | 1042.60 | 1042.60 |
| High | 0.00 | 0.00 | 0.00 | 0.00 | 5.00 | 5.00 | 53.42 | 53.42 | 0.00 | 0.00 | 0.00 | 0.00 |
| UHB | Low | 0.00 | 0.00 | 0.00 | 0.00 | 80.00 | 40.00 | 479.08 | 274.01 | 0.00 | 0.00 | 0.00 | 0.00 |
| Moderate | 12.50 | 12.50 | 80.86 | 80.86 | 20.00 | 60.00 | 230.74 | 435.81 | 100.00 | 100.00 | 986.98 | 986.98 |
| High | 0.00 | 0.00 | 0.00 | 0.00 | 0.00 | 0.00 | 0.00 | 0.00 | 0.00 | 0.00 | 0.00 | 0.00 |
| MHB | Low | 100.00 | 100.00 | 1075.33 | 1075.33 | 12.50 | 37.50 | 239.07 | 378.83 | 100.00 | 100.00 | 207.99 | 207.99 |
| Moderate | 0.00 | 0.00 | 0.00 | 0.00 | 75.00 | 50.00 | 688.14 | 548.37 | 0.00 | 0.00 | 0.00 | 0.00 |
| High | 0.00 | 0.00 | 0.00 | 0.00 | 12.50 | 12.50 | 53.42 | 53.42 | 0.00 | 0.00 | 0.00 | 0.00 |
| LHB | Low | 0.00 | 0.00 | 0.00 | 0.00 | 100.00 | 71.43 | 688.18 | 496.25 | 0.00 | 0.00 | 0.00 | 0.00 |
| Moderate | 100.00 | 100.00 | 728.90 | 728.90 | 0.00 | 28.57 | 0.00 | 191.94 | 100.00 | 100.00 | 55.62 | 55.62 |
| High | 0.00 | 0.00 | 0.00 | 0.00 | 0.00 | 0.00 | 0.00 | 0.00 | 0.00 | 0.00 | 0.00 | 0.00 |

**References**

Dwivedi, P., & Yadav, B. K. (2025). Inference of hydrological modelling and field-based monitoring on dynamics of heavy metals in water of Hindon Basin. Journal of Hydrology: Regional Studies, 60, 102488.

Jin, Y., O'Connor, D., Ok, Y. S., Tsang, D. C., Liu, A., & Hou, D. (2019). Assessment of sources of heavy metals in soil and dust at children's playgrounds in Beijing using GIS and multivariate statistical analysis. Environment international, 124, 320-328.

Chen, L., Wang, X., Wang, Y., & Gao, P. (2023). Improved entropy weight methods and their comparisons in evaluating the high-quality development of Qinghai, China. Open Geosciences, 15(1), 20220570.

American Public Health Association (APHA), Standard Methods for the Examination of Water and Waste Water, 20th ed., Washington, DC, 1998.
